1 **Polyvinyl Chloride Biodegradation Fuels Survival of Invasive Insect**

2 **Larva and Intestinal Degrading Strain of *Klebsiella***

3 Zhang Zhe<sup>1,2</sup>, Haoran Peng<sup>1,2</sup>, Dongchen Yang<sup>3</sup>, Guoqing Zhang<sup>1,2</sup>, Jinlin Zhang<sup>3</sup> and Feng  
4 Ju<sup>1,2,4\*</sup>

5 <sup>1</sup>Key Laboratory of Coastal Environment and Resources of Zhejiang Province, School of  
6 Engineering, Westlake University, 18 Shilongshan Road, Hangzhou 310024, Zhejiang Province,  
7 China

8 <sup>2</sup>Institute of Advanced Technology, Westlake Institute for Advanced Study, 18 Shilongshan Road,  
9 Hangzhou 310024, Zhejiang Province, China

10 <sup>3</sup>College of Plant Protection, Hebei Agricultural University, Baoding 071000, China

11 <sup>4</sup>Westlake Laboratory of Life Sciences and Biomedicine, Hangzhou, China

12

13 **\* Corresponding to:**

14 Dr. Feng Ju (Assistant Professor)

15 **Address:**

16 Environmental Microbiome and Biotechnology Lab (EMBLab)

17 Westlake University, 18 Shilongshan Road, Hangzhou 310024, China

18 Tel.: 571-87963205 (lab), 571-87380995 (office)

19 Fax: 0571-85271986

20 E-mail: [jufeng@westlake.edu.cn](mailto:jufeng@westlake.edu.cn) ; [richieju520@gmail.com](mailto:richieju520@gmail.com)

21 **Abstract**

22 Microbial degradation of polyvinyl chloride (PVC) is eco-friendly and economically  
23 attractive, but extremely challenging due to the lack of mechanistic understanding on the  
24 degrading strains and enzymes. Motivated by an accidental discovery that the larva of an  
25 agricultural invasive pest, *Spodoptera frugiperda*, effectively survived solely on PVC film,  
26 we profiled the intestinal microbiota of *S. frugiperda* and screened for PVC-degrading strains.  
27 The results showed PVC film feeding significantly changed the larvae intestinal microbiota  
28 through selective enrichment of *Enterococcus*, *Ochrobactrum* and *Klebsiella*. From the larva  
29 intestines, we isolated and named a biofilm-forming strain EMBL-1, and experimentally  
30 verified it as the first *Klebsiella* bacterium that can actively degrade and utilize PVC based on  
31 various classic physicochemical and morphological analyses. We further used multi-omics  
32 analyses that complementarily integrate whole genomic, transcriptomic, proteomic, and  
33 metabolic insights to identify enzyme-coding genes responsible for PVC degradation and  
34 proposed a putative biodegradation pathway by the bacterial strain. All in all, both *S.*  
35 *frugiperda* and its intestinal strain EMBL-1 are discovered to effectively survive on PVC film  
36 by exploiting its polymer as a sole energy source. Moreover, this work exemplifying PVC  
37 biodegradation provides reference for discovering more degrading microbes and enzymatic  
38 resources of other recalcitrant plastics.

39 **Keywords:** *Spodoptera frugiperda*; intestinal microorganisms; polyvinyl chloride (PVC);  
40 *Klebsiella*; degrading enzymes; multi-omics

41

## 42 **Introduction**

43 The globally increasing accumulation and pollution of wasted plastics is a serious eco-  
44 environmental and socio-economic problem <sup>1</sup>. Polyvinyl chloride (PVC) is one of the six  
45 widely used plastic polymers, such as polyethylene (PE), polystyrene (PS), polypropylene  
46 (PP), polyurethane (PUR) and polyethylene terephthalate (PET). Its market share (10.0%) is  
47 second only to PE (29.7%) and PP (19.3%) based on the European polymer demand<sup>2</sup>,  
48 producing tremendous plastic wastes. Landfill and incineration processes are commonly used  
49 for the treatment and final disposal of plastic wastes. However, such energy-intensive  
50 technologies and industries, unfortunately, treat plastics solely as useless wastes rather than  
51 recyclable resources. Worse still, numerous harmful secondary pollutants (e.g., chloride and  
52 dioxins) and green-house gases are largely and continuously released into our water, soil and  
53 air environment<sup>3</sup>, making these economically unattractive technologies eco-environmentally  
54 risky and unsustainable. Unfortunately, no green or sustainable approach is practically  
55 available for cost-effective and environmentally friendly disposal of PVC wastes, calling for  
56 methodological and technological innovations in the treatment and recycling of such man-  
57 made plastics.

58 Biological treatment and recycling of organic wastes is a promising approach for the future  
59 development of circular green economy <sup>4,5</sup>. PVC is considered very difficult to be  
60 biodegraded because of its recalcitrant nature <sup>6</sup>. It has the same linear structure as PE except  
61 for one of its hydrogens replaced with a chloride atom. However, current research progress on  
62 the biodegradation of PVC polymers far lags behind that of PE <sup>7-12</sup> and other plastics (e.g.,  
63 PET<sup>13-15</sup>). Until now, although limited research reported the biodegradation of PVC materials  
64 including plasticizers by microbial consortia <sup>3,16,17</sup>, little is, however, known about the  
65 responsible PVC-degrading microbes or biodegradation pathways (e.g., enzymes and  
66 products). Other research empirically speculated PVC biodegradation by several fungal (i.e.,  
67 Basidiomycotina, Semi-bacterial, Ascomycota) or bacterial (i.e., *Pseudomonas*,  
68 *Mycobacterium*, *Bacillus* and *Acinetobacter*) groups based on solely morphological and  
69 physicochemical changes (e.g., surface damage and molecular weight loss) that visually

70 signify plastic degradation<sup>18-22</sup>. While these prior studies may generally provide preliminary  
71 evidence for microbial PVC degradation, the biodegradation mechanisms remain unexplored.  
72 In particular, there is no report on microbial or bacterial genes and enzymes in the degradation  
73 of PVC<sup>23</sup>, excluding Nazia Khatoon's documentation of PVC-degrading activity of an  
74 extracellular lignin peroxidase of fungal *Phanerochaete chrysosporium*<sup>24</sup>. Therefore, global  
75 efforts are urgently needed to discover PVC-degrading microbes and enzymatic resources,  
76 and untangle the underlying biodegradation mechanisms to develop oriented engineering  
77 tools and biotechnology for prospering future industry of PVC wastes treatment and recovery.

78 During laboratory cultivation of an agriculturally invasive insect *Spodoptera frugiperda*, we  
79 accidentally discovered that the insect larva actively bit and fed on PVC film (Figure 1a).  
80 Motivated by curiosity and recent reports that some insect species (particular the larvae of  
81 wax moths and meal moths<sup>25</sup>) can consume plastic polymers of PE or PS<sup>26-29</sup>, we specifically  
82 designed triplicate cultivation experiments to check whether the larva can survive solely on  
83 PVC film and whether their intestinal microbiota may play a role in the film digestion,  
84 leading to our first discovery of intestinal microbiota-dependent ability of *S. frugiperda* larva  
85 to degrade PVC for effective survival. Further, using PVC film as the sole energy and organic  
86 carbon source, we successfully isolated the first PVC-degrading *Klebsiella* strain (named  
87 EMBL-1) from the intestinal microbiota of the larvae. We explored the biodegradation  
88 enzymes and genes, and metabolic products of PVC film and proposed the first metabolic  
89 pathway for bacterial PVC biodegradation based on multi-omics approaches (e.g., genomics,  
90 transcriptomics and proteomics). This work systematically exemplifies an integrated use of  
91 multi-omics approaches universal for comprehensively mining biodegradation strains, genes  
92 and enzymes of plastics other than, providing a theoretical basis for future biodegradation-  
93 based enzymatic recycling of plastic wastes, as has been recently demonstrated for PET<sup>13-15</sup>.

## 94 **Results**

### 95 **Discovery and verification of *S. frugiperda* larva survival fueled by PVC biodegradation**

96 To verify our discovery that larva of *S. frugiperda* can consume PVC film for effective

97 survival, laboratory cultivation experiments were specifically designed and conducted in  
98 triplicates to compare the key physiological indexes (i.e., survival rate, body weight and body  
99 length) and intestinal microbiota between the larva under starvation (Starvation group, n =  
100 15 ), feeding solely on PVC film (PVC group, n = 50), and feeding normally on corn leaves  
101 (Corn group, n = 30), respectively (Figure 1a). Overall, the survival rate of the larvae in the  
102 PVC film group (70%) after 5-day cultivation was significantly higher than that of the  
103 Starvation group (25%), although lower than that of the Corn group (100%,  $P < 0.0001$ )  
104 (Figure 1b). This result consisted with the significantly increase ( $P < 0.0001$ ) in the body  
105 weight (Figure 1c) and length (Figure S1a) of the larva groups in the following order:  
106 Starvation < PVC < Corn, indicating that the PVC film can provide energy for and maintain  
107 the survival of the larva, although the growth efficiency of this specialized feeding with PVC  
108 is lower than that with the normal corn leaves, as also morphologically manifested by the  
109 contrasting excreted feces (Figure S1b). Moreover, scanning electron microscopy (SEM)  
110 analysis of the PVC fragments recovered from excreted feces showed strong surface damage  
111 (Figure S1c). These results together verify our discovery that the gut PVC biodegradation  
112 fuels the survival of *S. frugiperda* larva.

### 113 **Interconnections between intestinal microbiota and PVC biodegradation**

114 The lack of evidence to date for plastic degradation by germ-free invertebrate larvae generally  
115 supports that intestinal microbiota are key drivers of plastic degradation<sup>25</sup>. Supporting our  
116 hypothesis that gut microbiota is essential for PVC degradation by *S. frugiperda* larva, the  
117 survival rate of the larva after 5 days was significantly reduced because of the gentamicin  
118 inhibition of intestinal microbiota. Accordingly, the body weight (Figure 1c) and body length  
119 (Figure S1a) of PVC-fed larva group treated by gentamicin were significantly lower than that  
120 without gentamicin treatment. The microbial biomass in the larvae intestinal microbiota of the  
121 Corn group kept stable during the experiment (from  $3.90 \pm 0.58$  to  $3.70 \pm 0.63 \times 10^6$  CFUs/piece),  
122 while the antibiotic-treated group showed an over 99% reduction in microbial biomass. These  
123 results suggest the dependence of PVC biodegradation on the larva intestinal microbiota.

124 The PVC film degradation by intestinal microbiota can release transformation products,  
125 which we hypothesize should create new ecological niches for microbiome selection through  
126 cross feeding. Consistent with the assumption, 16S rRNA gene amplicon sequencing analysis  
127 of intestinal microbiota showed that PVC film degradation triggered a dramatic compositional  
128 shift from Proteobacteria-dominated ( $87.5 \pm 8.0\%$  to  $49.5 \pm 16.0\%$ ) to Firmicutes-abundant  
129 ( $11.9 \pm 7.2\%$  to  $44.2 \pm 17.0\%$ ), microbiota (Figure 1d). Further cross-group comparisons down  
130 to the levels of genus and amplicon sequence variants (ASVs) showed that compared with the  
131 normal feeding with corn leaves, PVC feeding and biodegradation dramatically increased the  
132 alpha diversity of ASVs in the larvae gut microbiota (i.e., Shannon's H index increased from  
133  $\sim 0.7$  to 2.0 and observed species from 30.6 to 70.0) and largely favored the selective  
134 enrichment of an unclassified *Enterococcus* ( $4.7 \pm 3.7\%$  to  $37.0 \pm 19.8\%$ ), *Ochrobactrum* ( $0.1 \pm$   
135  $0.2\%$  to  $3.4 \pm 0.7\%$ ) and *Klebsiella* ( $1.4 \pm 0.6\%$  to  $1.7 \pm 0.4\%$ ) (Figure 1e), revealing close  
136 interconnection between intestinal microbiota and PVC biodegradation.

### 137 **Identification of strain EBML-1 as the first PVC-degrading *Klebsiella* bacterium**

138 Because the larvae intestinal microbiota of *S. frugiperda* are found to associate with PVC film  
139 degradation, we then assumed that the larvae intestine should represent an important reservoir  
140 of PVC-degrading strains and promiscuous enzymatic resources. During laboratory screening  
141 (Figure S2a), a gram-negative strain (Figure S2b-2c), named as EMBL-1, formed a visible  
142 biofilm on the surface of the PVC film after 10-day incubation, causing cracks on the surface  
143 of the PVC film (Figure 2a), accompanying a dramatic increase in biomass concentration, i.e.,  
144 OD600 from 0.20 to 0.94 (Figure 2b). The cracks formed during initial film degradation could  
145 facilitate further plastic degradation<sup>30</sup>. The strain was further identified as a new *Klebsiella*  
146 bacterium most closely related to *Klebsiella variicola* and *Klebsiella pneumoniae* based on  
147 PCR cloning, sequencing, and phylogenetic analysis of 16S rRNA gene (Figure S2d-2e).

148 The surface of the PVC film already formed a compact biofilm after 90-day incubation,  
149 and after removing the biofilm it showed more pits and cracks. The results of contact angle

150 (Figure S3a) and tensile strength tests of PVC films (Figure 2c) indicated the surface  
151 hydrophobicity and tensile strength of PVC film cultured with strain EMBL-1 had changed  
152 significantly. These results together suggested that EMBL-1 did damage the physical integrity  
153 of the PVC film. During the experiment, the weight loss of the PVC film inoculated with  
154 strain EMBL-1 continued to significantly increase over 90 days, and the final average weight  
155 loss of the PVC film reached 19.57% (Figure 2d). The results of Advanced Polymer  
156 Chromatography (APC, Waters, China) showed that compared with the control group, the  
157 molecular weight measures, i.e., Mn and Mw, of the PVC film in EMBL-1 strain group were  
158 decreased by 12.4% and 15.0%, respectively (Figure 2e), indicating that the long-chain  
159 structure of PVC was depolymerized, producing lower molecular weight fragments. Moreover,  
160 Thermogravimetric Analysis (TGA/DSC 3+/1600 HT, Mettler-Toledo, Switzerland) results  
161 showed that the  $T_{max}$  and  $T_{onset}$  of the PVC film in the EMBL-1 group markedly dropped from  
162 316°C to 279°C, and 273°C to 253°C (Figure 2f), respectively, while those metrics showed  
163 limited change ( $T_{max}$ : 316°C to 310°C and  $T_{onset}$ : 273°C to 265°C) in the control group (Figure  
164 S3b-3c), suggesting that the strain EMBL-1 had attacked the PVC polymer chain and reduced  
165 the chemical stability of the PVC film.

#### 166 **Strain EMBL-1 degrades PVC polymer but not plasticizers in the film**

167 Once PVC is demonstrated to be depolymerized by EMBL-1, we further questioned on the  
168 diversity of transformation products by the strain. Semiquantitative FTIR MICRO  
169 SPECTROMETER (ThermoFisher, Nicolet iS50, China) analysis showed that the infrared  
170 spectrum of the surface of the PVC film inoculated with strain EMBL-1 gradually differed  
171 from that of the control group over time (Figure 2f), forming new functional groups such as  
172 hydroxyl ( $3500-3300\text{ cm}^{-1}$ ) and carbonyl ( $1550-1650\text{ cm}^{-1}$ ), indicating microbial oxidation of  
173 the PVC film. Moreover, the peaks intensity of C-Cl stretch<sup>3</sup> ( $690\text{ cm}^{-1}$ ) showed a decreasing  
174 trend over time, indicating that the PVC film had a dechlorination reaction under the action of  
175 the EMBL-1 strain (Figure 2g). Further, we used GC-MS to quantitatively profile the  
176 degradation products of PVC films within 90 days. By comparative inspection of the peaks  
177 with significant differences between the EMBL-1 group and control group, we identified six

178 degradation products (Compounds 1 to 6) (Figure 2h), which were sequentially identified as  
179 “2-ethylhexanol” (1), “2-nonanol adipic acid” (2), “adipic acid, methyl octyl ester” (3), “octyl  
180 myristate” (4), “dodecanoic acid, isooctyl ester” (5) and “hexadecenoic acid, 1-methylheptyl  
181 ester (6)” according to high match score (> 800) of each compound in the NIST library  
182 (Figure S4). In contrast, the GC-MS results of the liquid culture did not show inspectable  
183 soluble degradation products of PVC (data not shown).

184 PVC film is composed of both polymer and plasticizers, the latter usually accounting for  
185 40% to 65% in amounts<sup>31</sup>. As expected, three main plastic additives, i.e., dioctyl adipate  
186 (DOA), dioctyl terephthalate (DOTP) and erucylamide (Figure S5a-5d and Table S1), were  
187 detected in the PVC film by Pyrolysis-GC-MS. Recently, PVC film degradation by enriched  
188 anaerobic marine consortia is implicated to start from the degradation of plasticizers and then  
189 extend to the degradation and destruction of the PVC polymer<sup>17</sup>. However, whether strain  
190 EMBL-1 effectively degrades the main plasticizers detected in the PVC film is unknown. Our  
191 triplicate degradation experiments showed no or negligible growth of strain EMBL-1 over 30-  
192 day incubation using each plasticizer as a sole energy source (Figure S5f), revealing that the  
193 strain could not degrade examined plasticizers under tested conditions.

#### 194 **Genome-level taxonomy and functional profiles of strain EMBL-1**

195 To explore the biodegradation mechanisms of PVC film, the complete genome of strain  
196 EMBL-1 was constructed based on co-assembly of short reads (150 bps × 2) and long reads  
197 (average 27628 bps) derived from Illumina next-generation sequencing and Nanopore third-  
198 generation sequencing, respectively. The result showed that the genome contains a 5,662,860  
199 bps circular chromosome with a G-C content of 57.31% and 5646 open reading frames (ORF)  
200 predicted as protein-coding genes. Interactive Tree of Life (iTOL) analysis with whole-  
201 genome strain information of *Klebsiella* extracted from the GTDB database (Figure 3a)  
202 showed that the genome sequence of strain EMBL-1 showed 99.01% average nucleotide  
203 identity (ANI) to its closest relative *Klebsiella variicola* (RS\_GCF\_000828055.2).



204 Functional annotation of strain EMBL-1 genome (Figure 3b) was performed by  
205 homology-based search against four databases, i.e., NR, GO, KEGG and CAZy. Through  
206 KEGG metabolic pathways and network analysis, strain EMBL-1 genome was found to  
207 encode 87 genes involving in the metabolism and biodegradation of xenobiotics such as  
208 phenylacetic acids and 4-hydroxyphenylacetate. Carbohydrate-Active Enzyme (CAZy)  
209 analysis showed the genome encoded 74 glycoside hydrolases (GHs), which should  
210 contribute to the strong digestion of lignocellulose-containing biomass (e.g., corn leaf) and  
211 absorption capacity of carbohydrates by the larvae of *S. frugiperda*. To facilitate identification  
212 of PVC-degrading enzymes, we systematically summarized reported genera and enzymes  
213 related to PE, PVC, and PET degradation, and found that strain EMBL-1 had a total of 11  
214 candidate plastic-degrading genes annotated as laccase, alkane monooxygenase, lipase,  
215 esterase, peroxidase and carboxylesterase in the KEGG database (Table 1 and Dataset S1),  
216 which provide firsthand genomic evidence for our finding that the EMBL-1 strain has the  
217 ability to degrade PVC polymer.

#### 218 **Proteomic analysis of PVC degradation by strain EMBL-1**

219 To further verify PVC-degrading enzymatic activities, strain EMBL-1 was regrown with PVC  
220 film for 30 days before harvesting cells for intracellular (IN) or extracellular (OTU) protein  
221 extraction and expression activity tests. The control group supplied with 1% glucose (glu) was  
222 set up to better differentiate metabolic activities of PVC degradation from those of common  
223 carbohydrates. The result showed no significant difference in the weight loss of PVC film  
224 between the experimental and control groups (Figure 4a), revealing that additional organic  
225 carbon source did not improve the PVC degradation efficiency of the strain. Instead, glucose  
226 addition only increased the glucose metabolism of the EMBL-1 strain (as evidenced by the  
227 following proteomic analysis), which in turn increased the protein (a) and biomass (b)  
228 contents of the strain (Figure S6). Moreover, the *in vitro* activity measurement showed PVC-  
229 degrading activity of the four protein extracts in the following decreasing order: OUT  
230 (13.5%) > OUTglu (10.4%) > IN (5.2%) > INglu (5.0%) (Figure 4b), suggesting that the  
231 strain exhibited stronger extracellular than intracellular activities for PVC degradation.

232 To comprehensively explore metabolic functions underlying PVC degradation by strain  
233 EMBL-1, we used LC-MS/MS quantitative proteomics to identify a total of 29 proteins  
234 jointly expressed in all four experimental and control groups (Figure 4c), plus 10 proteins  
235 jointly expressed in only the two PVC-degrading experimental groups (Dataset S2). By  
236 inspecting the differential expression activities of the 39 key proteins between intracellular  
237 (IN) and extracellular (OUT) proteomes, we nominated two main categories of proteins  
238 associated with PVC degradation. Firstly, we focused on the five most extracellularly (OTU)  
239 expressed proteins (Figure 4d), including i) catalase-peroxidase, enolase, and aldehyde  
240 dehydrogenase which are most likely responsible for the biodegradation of PVC or  
241 depolymerized byproducts, and ii) highly-conserved and universal elongation factor Tu and  
242 chaperone protein closely related to microbial translation and protective cell responses to  
243 nutrient starvation<sup>46</sup> and heat shock (or other co-defensed harmful conditions such as  
244 alcohols, inhibitors of energy metabolism, and heavy metal)<sup>47</sup>, respectively. Among them,  
245 catalase-peroxidase has strong redox capacity and polymer depolymerization ability, which  
246 has also been reported to degrade lignin<sup>48</sup>, while enolase with lyase activity and aldehyde  
247 dehydrogenase with redox activity on aldehyde groups are considered the putative PVC-  
248 degradation proteins. Moreover, we identified another five proteins strongly upregulated  
249 (defined here as  $\text{Log}_2(\text{OUT}/\text{IN}) \geq 3$ ) extracellularly (OTU) than intracellularly (IN) (Figure  
250 4d), such as i) dihydroxy-acid dehydratase which can degrade depolymerized products  
251 through cleavage of carbon-oxygen bonds (Figure 5), ii) entericidin EcnA/B family protein  
252 that can manifest the strain's stress responses to toxic substances (e.g., PVC plasticizers), iii)  
253 porin OmpC and outer membrane proteins that can transport some small molecule metabolites,  
254 and iv) glutamate synthase large subunit known to involve in ammonia assimilation<sup>49</sup>.

### 255 **Transcriptomic analysis of PVC degradation by strain EMBL-1**

256 To identify enzyme-coding genes associated with PVC film degradation, strain EMBL-1 was  
257 first grown on the PVC film in triplicate for 10 days. The weight loss of the film reached  
258 about 7% (Figure 4a), accounting for ~ 3 times increase in the strain biomass ( $\text{OD}_{600}$  increase

259 from 0.20 to 0.61, **Figure 4e**). We then performed whole transcriptomic analysis of strain  
260 EMBL-1 to screen out 77 out of 96 differentially expressed genes that were significantly  
261 (FDR-adjusted  $P \leq 0.05$ ) up-regulated ( $\log_2(\text{FC}) > 0.5$ ) or downregulated ( $\log_2(\text{FC}) < -0.5$ ) in  
262 the PVC film group (see red spheres, **Figure 4f**), compared with the control group (Dataset  
263 S3). Most of the gene expression activities were ascribed to cell growth and death (e.g.,  
264 elongation factor G, 50S ribosomal protein, and DNA-directed RNA polymerase), followed  
265 by transport and catabolism (e.g., MFS transporter, amino acid ABC transporter, and TonB-  
266 dependent siderophore receptor) (**Figure 4g**). Among them, three transcriptionally active  
267 genes were also highly represented in the extracellular (OUT) and/or intracellular (IN)  
268 proteomes of the strain (see proteins marked in red, **Figure 4d**). Notably, biodegradation-  
269 related genes, such as MBL fold metallo-hydrolase, phenylacetic acid degradation protein,  
270 and alkyl hydroperoxide reductase, showed active upregulated expression during the strain's  
271 PVC-dependent growth (**Figure 4g**), revealing their involvement in the PVC degradation.

#### 272 **Multi-omics analysis of PVC degradation pathway by strain EMBL-1**

273 Based on the above multi-omics approaches that incorporates complementary results of  
274 genome, transcriptome, proteome and metabolites analyses, strain EMBL-1 was found to  
275 encode peroxidase, alkane monooxygenase, laccase, lipase, esterase, and carboxylesterase  
276 known to degrade PE and/or PET (**Table 1 and Dataset S1**)<sup>48,50-53</sup>. These enzymes probably  
277 participate in the biodegradation of PVC and its byproducts through a putative pathway which  
278 includes the abiotic effect, extracellular enzymatic depolymerization, and the intracellular  
279 metabolism of degradation by products (**Figure 5**).

280 First, abiotic factors including light and oxygen are widely considered to induce plastic  
281 degradation reactions which are initiated via C-C and C-H scission<sup>12,50,52,54</sup>. These factors are  
282 most likely to attack and modify PVC polymer via hydroxyl dichlorination and carbonylation,  
283 as supported by FTIR diagram (**Figure 2f**). Then, catalase-peroxidase, known to degrade  
284 polymers (e.g., lignin<sup>48</sup>) and found by our study as the 4<sup>th</sup> most extracellularly expressed  
285 protein during the PVC-dependent growth of strain EMBL-1 (**Figure 4d**), depolymerizes the

286 modified polymer and converts it into C24~C5 byproducts, as detected by GC-MS/MS  
287 analysis (Figure 2g). The multi-omics profiles of other metabolites and degradation enzymes  
288 support further stepwise transformation of the long-chain products eventually into shorter  
289 ones (importable by strain EMBL-1) through a series of enzymatic reactions catalyzed by  
290 laccase<sup>34</sup>, monooxygenase<sup>55</sup>, dioxygenase, aldehyde dehydrogenase, esterase and dihydroxy-  
291 acid dehydratase (Figure 5), among which dioxygenase has been reported to modify and  
292 degrade plastic polymer via oxidation of C=C functional group<sup>56</sup>. Although laccase, alkane  
293 monooxygenase, dioxygenase, esterase, and lipase are below detection by proteomic analysis  
294 of EMBL-1, the strain possesses genes encoding these enzymes (Table 1). It is likely that the  
295 binding substrate intermediates of these enzymes are promptly consumed by the strain during  
296 PVC-dependent growth. Last but not the least, many genes encoding transport and catabolic  
297 proteins are found to be highly represented in the proteomes (d) and transcriptomes (g) of  
298 strain EMBL-1 (Figure 4). They are responsible for the transportation of small organic  
299 molecules and fatty acids to support intracellular catabolism to support the strain's growth  
300 using PVC as sole energy source.

## 301 Discussion

302 Microbial and enzymatic degradation of PVC is a grand global challenge. The limited number  
303 of reported PVC-degrading strains are originated from natural and non-host environments  
304 such as soil<sup>22</sup>, landfills<sup>16</sup>, and marine environments<sup>17,21,57</sup>, and the underlying biodegradation  
305 mechanisms remain unexplored. This study is the first report on PVC-degrading microbiota,  
306 strain, enzymes, and mechanism in the larvae intestines of an agriculturally invasive insect.  
307 We discover that the larva of *S. frugiperda* can survive solely on the energy derived from  
308 PVC degradation by intestinal microbiota, and further successfully isolate and experimentally  
309 verify strain EMBL-1 as the first PVC-degrading *Klebsiella* bacterium. The isolate is  
310 taxonomically identified to belong to *Klebsiella variicola* (ANI > 99%). This species is  
311 regarded as an emerging pathogen of human and other animals<sup>58</sup>. It also harbors plant-  
312 associated isolates<sup>59</sup> that can fix nitrogen (to enable its co-existence with plants)<sup>60</sup>, and  
313 degrade xenobiotic pollutants (e.g., atrazine<sup>61</sup>) and natural polymers (e.g., lignin and

314 cellulose<sup>62,63</sup>). Most importantly, our discovery of strain EMBL-1 and multi-omics exploration  
315 of its PVC biodegradation mechanisms (as further discussed below) provide promising  
316 methodology framework and research direction to guide future mechanistic investigations on  
317 other PVC-degrading microbes as well as microbial degradation of other plastics.

318 Besides the discovery of PVC-degrading strain EMBL-1, we also demonstrate an  
319 innovative use of multi-omics approaches that complementarily integrate DNA, mRNA,  
320 protein, and metabolite analyses for mining and elucidating microbial PVC biodegradation.  
321 Our multi-omics results show that PVC polymers and the monomers are effectively utilized  
322 by the strain to derive energy for growth. The *Klebsiella* strain is found to utilize combined  
323 actions of extracellular and intracellular enzymes to achieve a powerful function in  
324 depolymerizing and decomposing monomers of PVC (Figure 5). It also exhibits strong  
325 adhesion ability and easily forms a biofilm on the PVC film (Figure 2a), which should largely  
326 facilitate its initial destruction of the hydrophobic surface structure of the PVC film by  
327 secreting extracellular proteins (as shown by proteome analysis, Figure 4b-4d), thus paving  
328 the road for its alternative lifestyle that utilizes PVC for growth<sup>64</sup>. During PVC degradation,  
329 39 proteins are differentially co-expressed by the strain, both extracellularly and  
330 intracellularly. They are responsible for either direct degradation of PVC and its  
331 depolymerized byproducts, or fundamental metabolism related with genetic or environmental  
332 information processing and cellular processes that supports PVC-dependent growth of the  
333 strain (Figure 4d). In particular, comparative transcriptomics showed significant upregulation  
334 of functional genes involved in the xenobiotics biodegradation and metabolism, cell growth  
335 and death, and transport and catabolism during cell growth (Figure 4g), revealing the strain's  
336 strong growth ability and molecule transport ability closely linked with extracellular PVC  
337 polymerization, further conversion, and eventual intracellular utilization.

338 Until now, except for the only report on the PVC-degrading activities of fungal lignin  
339 peroxidase in *Phanerocheate chrysosporium*<sup>24</sup>, little is known about PVC-degrading pathway,  
340 genes and enzymes in bacteria. PVC and PE have similar stable chain structures. Oxidase is a  
341 class of enzymes with better activity in the PE-degradation enzymes, which can add oxygen

342 to the long carbon chain<sup>65</sup>, then it generates free radicals to form carboxyl groups, alcohols,  
343 ketones and aldehydes<sup>31</sup>, such as monooxygenase and dioxygenase, etc.<sup>66</sup> The oxidation and  
344 cleavage of PE make the polymer more hydrophilic, thus facilitate its contact with other  
345 extracellular enzymes (e.g., lipase and esterase) after carboxyl group formation, or  
346 endopeptidase of amide group<sup>31</sup>. In addition, Eyheraguibel et al. reported that the Facilitor  
347 superfamily (MFS) or a vector containing an ATP binding cassette (ABC) can integrate small  
348 molecular weight PE oligomers into cells to achieve PE degradation<sup>67</sup>. The results of genomic,  
349 transcriptomic, and proteomic of the EMBL-1 strain together lead to our proposal of its  
350 microbial PVC biodegradation pathway (Figure 5), advancing current mechanistic  
351 understanding of bacterial PVC degradation.

352 In summary, we discover and fully verify EMBL-1 as the first PVC-degrading bacterium  
353 belong to *Klebsiella*, and further demonstrate the use of multi-omics approaches to achieve  
354 first in-depth insights into and systematic knowledge on its degradation mechanism of PVC.  
355 In addition, our discovery of the *S. frugiperda* larva survival fueled by microbial  
356 biodegradation of polyvinyl chloride lays the foundation for a follow-up study to elucidate the  
357 biodegradation mechanisms of PVC polymers in the larvae intestinal microbiota of this  
358 agricultural invasive insect and to mine other hidden plastic-degrading strains and enzymatic  
359 resources therein.

## 360 **Conclusion**

361 Microbial biodegradation-based recycling of plastic wastes is promising but extremely  
362 challenging, especially when biodegradation mechanism is unknown. In this study, we started  
363 from the discovery of *S. frugiperda* larvae feeding on PVC film, explored the intestinal  
364 microbiota changes underlying effective larvae survival, and finally isolated PVC-degrading  
365 *Klebsiella* strain EMBL-1 which exhibited PVC-dependent growth. Through multi-omics  
366 analyses integrating first genome, transcriptome, protein and metabolite-level insights into in  
367 the strain, we identified a group of functional genes, enzymes, and metabolic pathways  
368 closely related to PVC degradation and proposed a hypothetical biodegradation pathway via

369 dechlorination, oxidation, depolymerization, and further degradation and mineralization. This  
370 study not only opens the gate to PVC-degrading microbiota, microbe, and enzymatic  
371 resources in the larvae intestine of an invasive agricultural insect, but also provide a multi-  
372 omics framework and an intriguing scenario that inspire future studies to exploit microbial  
373 biodegradation of other recalcitrant plastics or xenobiotic contaminants (e.g., pesticides).  
374 More importantly, when today microbial and enzymatic biodegradation is demonstrated as an  
375 eco-environmentally sustainable and commercially promising biotechnology for the recycling  
376 of wasted PET<sup>13-15</sup>, our study striving to systematically decipher the mechanisms underlying  
377 bacterial PVC biodegradation should lay a foundation for a follow-up study to explore and  
378 eventually realize sustainable treatment and recycling of PVC plastics enabled by the iterative  
379 cycle of “Design-Build-Test-Learn (DBTL)” for DNA, strain and enzymatic engineering.

## 380 **Methods**

### 381 **Field sampling and laboratory cultivation experiments**

382 The larva of *S. frugiperda* were collected from corn fields in Jiangcheng County, Yunnan  
383 Province, China. They were then cultured indoors by feeding corn leaves (artificial insect  
384 breeding room with temperature of 25°C and humidity of 50%-60%). To validate the larva’s  
385 ability to live on PVC film, 120 pieces of 4<sup>th</sup>-instar larva with the same growth status were  
386 divided into three groups: 1) Control group (starvation, 15 pcs), 2) Corn group (fed with corn  
387 leaves, 40 pcs), and 3) PVC group (fed with PVC film, 60 pcs). Other experimental  
388 conditions, such as specific breeding conditions and PVC film cleaning, were kept the same,  
389 as detailly described in **Method S1**. The weight and body length of all numbered larva were  
390 measured after 24-h starvation and after the 5-day experiment. By the end of the experiment,  
391 the excreted feces of each experimental group were collected and the number of survivals was  
392 counted. Subsequently, the surviving larva in the Corn group and PVC group were dissected  
393 under aseptic conditions to obtain intestinal samples (see details in **Method S2**), which were  
394 labeled and temporarily stored at 4 °C until further operation. The intestinal feces (IF) samples  
395 collected from the PVC and Corn groups were labeled as PVC\_IF and Corn\_IF, respectively.

396 In addition, residual PVC fragments were also recovered from the excreted feces of the PVC  
397 group to characterize their surface morphological changes by Hitachi Field Emission  
398 Scanning Electron Microscope (Regulus 8230, Japan).

399 We hypothesized that intestinal microbiota of *S. frugiperda* larva should play an essential role  
400 in digesting PVC film to enable its observed and experimentally verified survival on the PVC  
401 film. To test the hypothesis, cultivation experiments were conducted to compare the key  
402 physiological indexes (i.e., body length, weight and survival rate) of PVC-fed larva with and  
403 without gentamicin pretreatment of their intestinal microbiota. The number of culturable cells  
404 in the intestinal microbiota were counted after ending the experiment.

#### 405 **16S rRNA gene amplicon sequencing analysis of intestinal microbiota**

406 **Molecular experiments and sequencing** Total DNA was extracted from intestinal feces  
407 samples collected from the experimental groups using QIAamp Fast DNA Stool Mini Kit  
408 following the manufacturer's recommendations (QIAGEN GmbH, Germany). Then,  
409 hypervariable V4-V5 regions of prokaryotic 16S rRNA gene were amplified using 515F (5'-  
410 GTGYCAGCMGCCGCGGTAA-3') and 926R (5'-CCGYCAATTYMTTTRAGTTT-3'). The  
411 amplicon products of each sample were evenly mixed and sequenced using a paired-end  
412 sequencing strategy (PE250) on the Illumina HiSeq2500. More details on the PCR conditions  
413 and experimental procedures were available in the [Method S3](#).

414 **Bioinformatics and statistical analyses** For the 16S rRNA gene amplicon data analysis,  
415 FastQC (v0.11.9) and cutadapt (v1.18) were first used to check the quality of the raw data and  
416 excise double-ended primers (fastaq files). Dada2 (v1.14) was then used to cluster the input  
417 sequence with default parameter settings and further denoise after importing double-ended  
418 data through Quantitative Insight into Microbial Ecology (QIIME2-2020.6) and input-format  
419 setting parameters. The next step was to select high-quality areas based on FastQC's report  
420 results. The taxonomic classification was conducted using the qiime2 built-in package, the  
421 feature-classifier classify-sklearn machine learning method was used for taxonomic



422 annotation using the SILVA 138 SSU as the reference database. The generated files were  
423 imported into R studio Version 1.1.414 (R version 4.0.3), and phyloseq (v1.32.0) was used for  
424 data statistical analysis and visualization. In addition, survival (v3.2.7) and survminer  
425 packages were used to calculate and draw the survival curve, while ggplot2 (v3.3.3) was used  
426 to draw box plots of weight and body length. The ANOVA test was used to check the  
427 significance of differences between experimental groups.

#### 428 **Enrichment, isolation, and identification of PVC-degrading strain EMBL-1**

429 To isolate PVC-degrading microbe, intestine materials of ten larva were suspended in 10-mL  
430 PBS solution and vortexed for 5 min. Then, the intestinal mucosa was removed from the  
431 mixed solution. The remaining suspension was used as a microbial inoculum and transferred  
432 to a 250-mL flask containing 0.1-g PVC film and 100-mL MSM liquid medium. Then it was  
433 cultivated on a shaker (150 rpm/min) at 30 °C, transferred every 15 days. After 45 days, the  
434 culture medium was first diluted and then spread onto MSM agar medium plate with PVC  
435 film as the sole carbon source to cultivate and enrich for degrading strains. The enrichment  
436 degrading strain was further sub-cultured until a pure colony of isolate was obtained.  
437 Depending on whether the isolates were grown in the PVC film-amended liquid MSM, the  
438 surface changes of the PVC film were inspected by SEM, until a PVC-degrading strain  
439 (named EMBL-1) was successfully obtained. To identify the strain, near full-length 16S  
440 rRNA gene sequence was PCR amplified using the universal primer set 27F (5'-  
441 AGAGTTTGATCCTGGCTCAG-3') and 1492R (5'- GGTTACCTTGTTACGACTT-3'). The  
442 16S rRNA gene amplicon sequence obtained from Sanger sequencing were deposited in the  
443 National Center for Biotechnology Information (NCBI accession no.: MZ475068) and  
444 annotated using the NCBI's online Basic Local Alignment Search Tool (BLAST) in August  
445 2021.

#### 446 **Biodegradation experiments of PVC film by strain EMBL-1**

447 To further explore the ability of strain EMBL-1 to degrade PVC film, three experimental

448 groups were designed: 1) MSM liquid medium (20 mL) + EMBL-1 strain (OD<sub>600</sub>=0.2); 2)  
449 MSM liquid medium (20 mL) + EMBL-1 strain (OD<sub>600</sub>=0.2) + PVC film (weighed); 3)  
450 MSM liquid medium (20 mL) + PVC film (weighed). Each experimental group was prepared  
451 in 27 replicates and immediately started upon inoculation of the strain cells. The following  
452 operational procedures were repeated every 10 days: i) take out the PVC films from three  
453 replicates of each group, ii) SEM microscopically inspect degradation of the PVC films and  
454 weigh them, and iii) replace the half of the MSM liquid medium. The entire experiment was  
455 lasted for 90 days, during which PVC films on 10 d and 90 d were collected and stored. The  
456 post-treatment methods of PVC film and downstream morphological and physicochemical  
457 characterization methods were described with details in the [Method S4](#) and [Method S5](#),  
458 respectively.

459 To ensure the biodegradation ability of strain EMBL-1 to PVC polymer, Gas Chromatography  
460 Mass Spectrometry (GC-MS, Trace1300-ISQ7000, ThermoFisher, Singapore) method was  
461 established to analyze the composition of additives in the film ([Method S6](#)). Further, culture  
462 experiments were set up in triplicates and operated for 30 days to check whether the EMBL-1  
463 strain is able to degrade and utilize the three major additives pre-identified from the PVC film  
464 ([Method S7](#)).

#### 465 **Characterization of PVC film damage and biodegradation products**

466 **PVC film damage** To validate and follow PVC film biodegradation progress by strain  
467 EMBL-1, multiple classic physicochemical methods were co-used to analyze the temporal  
468 changes in the morphological, compositional, and other physiochemical properties over 90  
469 days. First, the colonization of the strain was morphologically characterized by SEM after cell  
470 fixation. Meanwhile, the degradation efficiency of the strain was directly measured based on  
471 the weight loss of the PVC film on a 10-day basis ([Method S5](#)). Further, changes in the  
472 physical properties of the PVC film were detected by contact angle and tensile strength tests  
473 ([Method S5](#)). The depolymerization of the plastic materials was also recorded by the change  
474 of molecular weight. FTIR MICRO SPECTROMETER (FTIR, ThermoFisher, Nicolet iS50,

475 China) was used to analyze and detect the changes in the surface chemical composition and  
476 functional groups of the PVC film. Thermogravimetric Analysis (TGA/DSC 3+/1600 HT,  
477 Mettler-Toledo, Switzerland) was used to compare the initial degradation temperature and the  
478 maximum degradation temperature of the PVC film, and obtain the composition and heat  
479 stability and thermal decomposition of the PVC film and the possible intermediate products.  
480 The Advanced Polymer Chromatography (APC, Waters China) was additionally used to  
481 determine the molecular weight of different groups of PVC films. The specific processing  
482 steps and testing conditions of FTIR, TGA and APC analyses were recorded in [Method S5](#).

### 483 **Biodegradation products**

484 To master more biodegradation evidence of the PVC film by EMBL-1 strain, we detected  
485 potential biodegradation products of PVC in the PVC films and cultural mediums by using  
486 GC-MS. Degraded PVC film weighing 0.3 g were cut into pieces and mixed with 10 mL  
487 tetrahydrofuran, the mixture was ultrasonicated for 30 min at room temperature. The extract  
488 was concentrated to 0.5 ml by nitrogen blowing treatment and it was mixed with 1 mL N-  
489 hexane to obtain some possible products by vortex an ultrasonic for 10 min. The samples  
490 filtered using 0.22 um PTFE syringe filter for further step<sup>68</sup>. The liquid culture (150 mL) was  
491 centrifuged at 10,000 rpm for 15 min, and the supernatant was extracted with the same  
492 volume of n-hexane. The extract was concentrated to 1 mL by nitrogen blowing treatment.  
493 The soluble daughter products in the filtrate were analyzed using GC-MS.

494 **GC-MS analysis of PVC-degradation products** The sample was injected at an initial  
495 temperature of 40 °C (hold 4 min) which was progressively increased at 10°C per minute and  
496 held at 280°C (hold 5 min). Moreover, the detector conditions such as transfer line  
497 temperature, ion source temperature, ionization mode electron impact and scan time were  
498 maintained at 250°C,280°C, 70 eV and 0.3 s respectively.

### 499 **Whole-genome sequencing analysis of PVC-degrading strain EMBL-1**

500 To further explore the biodegradation mechanism of PVC film by strain EMBL-1 and

501 discover the responsible PVC-degrading genes or enzymes, TIANamp Bacteria DNA Kit was  
502 used to extract the genomic DNA of the strain and the genomic DNAs of the EMBL-1 strain  
503 was split into two fetches and sequenced using on both Illumina next-generation sequencing  
504 (PE150) and Oxford Nanopore (PromethION). The experimental procedures including sample  
505 quality testing, library construction, library quality testing, and library sequencing were  
506 performed in accordance with the standard protocol provided by sequencer providers.  
507 Bioinformatics analysis includes five major steps: raw data quality control, genome assembly,  
508 genome component analysis, functional annotation, and genome visualization. In brief, the  
509 quality control of raw short reads from Illumina sequencing and raw long reads from  
510 Nanopore sequencing were performed in Fastp 0.19.5 and Mecat 2, respectively. Then, the  
511 clean short and long reads were co-assembled to reconstruct complete genome using Unicycler  
512 (<https://github.com/rrwick/Unicycler>) to generate complete. Predictive coding sequence (CDS)  
513 was predicted using Glimmer version 3.02<sup>69</sup> ). Databases such as KEGG, COG, GO, and  
514 CAZy are used for function annotation. In addition, the MUMmer software (v3.23) was used  
515 to compare the target genome with the reference genome to determine the collinearity  
516 between the genomes.

#### 517 **Proteomic analysis of PVC film degradation by strain EMBL-1**

518 To mine enzymatic activities and metabolic pathways related to PVC degradation,  
519 biodegradation experiments of PVC film by the EMBL-1 strain were conducted with and  
520 without additional supply of 1% (w/v) glucose (to resolve its proteomic signals from that of  
521 PVC film). Then, both intracellular and extracellular proteins were separately extracted from  
522 the cells harvested after 30 days based on the acetone precipitation method. The ability of the  
523 protein solutions to degrade PVC film was further tested *in vitro* (**Method S8**). Meanwhile,  
524 proteins were resolved with the Thermo Ultimate 3000 integrated nano-HPLC system which  
525 is directly interfaced with the Thermo orbitrap fusion lumos mass spectrometer (LC-MS/MS)  
526 to explore some related PVC degradation proteins. Details on the experimental setups and  
527 procedures, protein extraction methods, protein activity tests, and proteomic analysis were  
528 described in **Method S9**.

529 **Transcriptomic analysis of PVC film degradation by strain EMBL-1**

530 **Experimental design** To mine genes related to PVC degradation, a degradation experiment  
531 of PVC film by the EMBL-1 strain were conducted for 10 d. a) MSM medium + EMBL-1  
532 (OD<sub>600</sub>=0.2), b) MSM medium +EMBL-1 (OD<sub>600</sub>=0.2) + PVC film (weighed), three  
533 repeats per group. All treatments were cultured in a shaker (30°C, 150 rpm). By the end of the  
534 experiment, the liquid culture was centrifuged in 4°C to harvest the cells. The total RNA of  
535 each treatment was extracted, and RNA integrity was assessed using the RNA Nano 6000  
536 Assay Kit of the Agilent Bioanalyzer 2100 system (Agilent Technologies). Sequencing  
537 libraries were generated using NEBNext Ultra Directional RNA Library Prep Kit for Illumina  
538 (NEB) and sequenced on an Illumina Hiseq 2500 platform. Sequencing was performed at  
539 Beijing Novogene Bioinformatics Technology Co., Ltd. The raw data of transcriptomic of 6  
540 samples from two groups were uploaded in the CNGB database (Sub 022027).

541 **Bioinformatics analysis** Raw reads were first filtered using fastp to remove the reads that  
542 contain 10 low-quality bases (base quality score less than 20) or length shorter than 36bp.  
543 Then, the resulting high-quality (HQ) reads were aligned to *Klebsiella variicola* reference  
544 genome (*Klebsiella variicola* strain FH-1) using hisat2. After alignment the read counts for  
545 each gene were extracted using htseq-count. The gene expression profiles of triplicate  
546 transcriptomes in two groups were compared with PCoA, which inspected one outlier dataset  
547 in each group (due to unexpected experimental errors) that was discarded from downstream  
548 analysis. Differential expression (DE) at a gene level in our two groups (group a) and group  
549 b)) was evaluated using edgeR version 3.30.3, implemented in R 4.0.3. The p-values  
550 presented are adjusted for multiple-testing with the procedure of Benjamini and Hochberg to  
551 control the type I error rate, and a cut off of  $p \leq 0.05$  was used as a threshold to define  
552 differential expression. Kraken2 was used to check the contamination in RNA-seq.

## 553 **Multi-omics-based prediction of degradation pathway of PVC film**

554 To further explore the degradation mechanism of PVC film by strain EMBL-1, multi-omics  
555 results from genome, transcriptome, proteome and metabolite analyses were co-used to  
556 propose a putative pathway of PVC degradation. In brief, the potential plastic-degrading  
557 genes encoded in the EMBL-1 genome (**Table 1 and Datasets S1**) and the metabolites detected  
558 by GC-MS were co-used to build a PVC degradation pathway. Further, 39 proteins jointly  
559 expressed during PVC-dependent growth of strain EMBL-1 (**Figure 4d and Dataset S2**) were  
560 aligned against the 96 differentially expressed genes revealed by transcriptomic analysis  
561 (**Figure 4f and Dataset S3**) using NCBI's BLAST+ 2.9.0 at an e-value cut off of 0.01,  
562 generating a list of gene expression and proteomic activities ascribed to the PVC-dependent  
563 metabolism of the strain.

## 564 **Acknowledgments**

565 We would like to thank Dr. Yubo Wang for the technical assistance with phylogenetic analysis  
566 of the strain EMBL-1 genome. We also thank Dr. Yinjuan Chen and Master Yu Huang from  
567 Instrumentation and Service Center for Molecular Sciences and Dr. Xiuxiu Zhao, Xue Bai and  
568 Jinheng Pan from Biomedical Research Core Facilities at Westlake University for the  
569 assistance and discussion during the experiment. This work was supported by the Startup  
570 Fund of Westlake University and the National Natural Science Foundation of China (Grant  
571 No.: 51908467).

## 572 **Reference**

- 573 1 Borrelle, S. B. *et al.* Predicted growth in plastic waste exceeds efforts to mitigate plastic  
574 pollution. *Science* **369**, 1515-1518 (2020).
- 575 2 Plastics – the Facts 2019 An analysis of European plastics production, demand and waste data.  
576 (2019).
- 577 3 Peng, B. Y. *et al.* Biodegradation of Polyvinyl Chloride (PVC) in *Tenebrio molitor*  
578 (Coleoptera: Tenebrionidae) larvae. *Environ Int* **145**, 106106,

- 579           doi:10.1016/j.envint.2020.106106 (2020).
- 580    4       Wei, R. *et al.* Possibilities and limitations of biotechnological plastic degradation and  
581           recycling. *Nature Catalysis* **3**, 867-871, doi:10.1038/s41929-020-00521-w (2020).
- 582    5       Leal Filho, W. *et al.* An overview of the problems posed by plastic products and the role of  
583           extended producer responsibility in Europe. *Journal of Cleaner Production* **214**, 550-558,  
584           doi:10.1016/j.jclepro.2018.12.256 (2019).
- 585    6       Wendy Amass, A. A., Brian Tighe. A Review of Biodegradable Polymers: Uses, Current  
586           Developments in the Synthesis and Characterization of Biodegradable Polyesters, Blends of  
587           Biodegradable Polymers and Recent Advances in Biodegradation Studies. *Polymer*  
588           *International* **47**, 89-144 (1998).
- 589    7       Restrepo-Flórez, J.-M., Bassi, A. & Thompson, M. R. Microbial degradation and deterioration  
590           of polyethylene – A review. *International Biodeterioration & Biodegradation* **88**, 83-90,  
591           doi:10.1016/j.ibiod.2013.12.014 (2014).
- 592    8       Sivan, A. New perspectives in plastic biodegradation. *Curr Opin Biotechnol* **22**, 422-426,  
593           doi:10.1016/j.copbio.2011.01.013 (2011).
- 594    9       Kumar Sen, S. & Raut, S. Microbial degradation of low density polyethylene (LDPE): A  
595           review. *Journal of Environmental Chemical Engineering* **3**, 462-473,  
596           doi:10.1016/j.jece.2015.01.003 (2015).
- 597    10      Montazer, Z., Habibi Najafi, M. B. & Levin, D. B. Challenges with Verifying Microbial  
598           Degradation of Polyethylene. *Polymers (Basel)* **12**, doi:10.3390/polym12010123 (2020).
- 599    11      Ru, J., Huo, Y. & Yang, Y. Microbial Degradation and Valorization of Plastic Wastes. *Front*  
600           *Microbiol* **11**, 442, doi:10.3389/fmicb.2020.00442 (2020).
- 601    12      Ghatge, S., Yang, Y., Ahn, J.-H. & Hur, H.-G. Biodegradation of polyethylene: a brief review.  
602           *Applied Biological Chemistry* **63**, doi:10.1186/s13765-020-00511-3 (2020).
- 603    13      Yoshida S, H. K., Takehana T, Taniguchi I, Yamaji H, Maeda Y, Toyohara K, Miyamoto K,  
604           Kimura Y, Oda K. A bacterium that degrades and assimilates poly(ethylene terephthalate).  
605           *Science* **351**, 1196-1199 (2016).
- 606    14      Tournier, V. *et al.* An engineered PET depolymerase to break down and recycle plastic bottles.  
607           *Nature* **580**, 216-219, doi:10.1038/s41586-020-2149-4 (2020).
- 608    15      Ma, Y. *et al.* Enhanced Poly(ethylene terephthalate) Hydrolase Activity by Protein  
609           Engineering. *Engineering* **4**, 888-893, doi:10.1016/j.eng.2018.09.007 (2018).

- 610 16 Anwar, M. S. *et al.* Response of indigenously developed bacterial consortia in progressive  
611 degradation of polyvinyl chloride. *Protoplasma* **253**, 1023-1032, doi:10.1007/s00709-015-  
612 0855-9 (2016).
- 613 17 Giacomucci, L., Raddadi, N., Soccio, M., Lotti, N. & Fava, F. Biodegradation of polyvinyl  
614 chloride plastic films by enriched anaerobic marine consortia. *Mar Environ Res* **158**, 104949,  
615 doi:10.1016/j.marenvres.2020.104949 (2020).
- 616 18 Z. Klrbas, N. K., A. Güner. Biodegradation of Polyvinylchloride (PVC) by White Rot Fungi.  
617 *Bull. Environ. Contam. Toxicol.* **63**, 335-342 (1999).
- 618 19 Das, G., Bordoloi, N. K., Rai, S. K., Mukherjee, A. K. & Karak, N. Biodegradable and  
619 biocompatible epoxidized vegetable oil modified thermostable poly(vinyl chloride): thermal  
620 and performance characteristics post biodegradation with *Pseudomonas aeruginosa* and  
621 *Achromobacter* sp. *J Hazard Mater* **209-210**, 434-442, doi:10.1016/j.jhazmat.2012.01.043  
622 (2012).
- 623 20 Vivi, V. K., Martins-Franchetti, S. M. & Attili-Angelis, D. Biodegradation of PCL and PVC:  
624 *Chaetomium globosum* (ATCC 16021) activity. *Folia Microbiol (Praha)* **64**, 1-7,  
625 doi:10.1007/s12223-018-0621-4 (2019).
- 626 21 Kumari, A., Chaudhary, D. R. & Jha, B. Destabilization of polyethylene and polyvinylchloride  
627 structure by marine bacterial strain. *Environ Sci Pollut Res Int* **26**, 1507-1516,  
628 doi:10.1007/s11356-018-3465-1 (2019).
- 629 22 Ali, M. I. *et al.* Isolation and molecular characterization of polyvinyl chloride (PVC) plastic  
630 degrading fungal isolates. *J Basic Microbiol* **54**, 18-27, doi:10.1002/jobm.201200496 (2014).
- 631 23 Giacomucci, L., Raddadi, N., Soccio, M., Lotti, N. & Fava, F. Polyvinyl chloride  
632 biodegradation by *Pseudomonas citronellolis* and *Bacillus flexus*. *N Biotechnol* **52**, 35-41,  
633 doi:10.1016/j.nbt.2019.04.005 (2019).
- 634 24 Khatoun, N., Jamal, A. & Ali, M. I. Lignin peroxidase isoenzyme: a novel approach to  
635 biodegrade the toxic synthetic polymer waste. *Environ Technol* **40**, 1366-1375,  
636 doi:10.1080/09593330.2017.1422550 (2019).
- 637 25 Lear, G. *et al.* Plastics and the microbiome: impacts and solutions. *Environmental Microbiome*  
638 **16**, doi:10.1186/s40793-020-00371-w (2021).
- 639 26 Yang, J., Yang, Y., Wu, W. M., Zhao, J. & Jiang, L. Evidence of polyethylene biodegradation  
640 by bacterial strains from the guts of plastic-eating waxworms. *Environ Sci Technol* **48**, 13776-  
641 13784, doi:10.1021/es504038a (2014).
- 642 27 Zhang, J. *et al.* Biodegradation of polyethylene microplastic particles by the fungus



- 643 Aspergillus flavus from the guts of wax moth Galleria mellonella. *Sci Total Environ* **704**,  
644 135931, doi:10.1016/j.scitotenv.2019.135931 (2020).
- 645 28 Ren, L. *et al.* Biodegradation of Polyethylene by Enterobacter sp. D1 from the Guts of Wax  
646 Moth Galleria mellonella. *Int J Environ Res Public Health* **16**, doi:10.3390/ijerph16111941  
647 (2019).
- 648 29 Yang, S. S. *et al.* Ubiquity of polystyrene digestion and biodegradation within yellow  
649 mealworms, larvae of Tenebrio molitor Linnaeus (Coleoptera: Tenebrionidae). *Chemosphere*  
650 **212**, 262-271, doi:10.1016/j.chemosphere.2018.08.078 (2018).
- 651 30 Yang, X., Steck, J., Yang, J., Wang, Y. & Suo, Z. Degradable Plastics Are Vulnerable to Cracks.  
652 *Engineering* **7**, 624-629, doi:10.1016/j.eng.2021.02.009 (2021).
- 653 31 Gewert, B., Plassmann, M. M. & MacLeod, M. Pathways for degradation of plastic polymers  
654 floating in the marine environment. *Environ Sci Process Impacts* **17**, 1513-1521,  
655 doi:10.1039/c5em00207a (2015).
- 656 32 Gyung Yoon, M., Jeong Jeon, H. & Nam Kim, M. Biodegradation of Polyethylene by a Soil  
657 Bacterium and AlkB Cloned Recombinant Cell. *Journal of Bioremediation & Biodegradation*  
658 **03**, doi:10.4172/2155-6199.1000145 (2012).
- 659 33 Fujisawa, M., Hirai, H. & Nishida, T. Degradation of polyethylene and Nylon-66 by the  
660 laccase-mediator system. *Journal of Polymers and the Environment* **9**, 103-108, doi:Doi  
661 10.1023/A:1020472426516 (2001).
- 662 34 Santo, M., Weitsman, R. & Sivan, A. The role of the copper-binding enzyme – laccase – in the  
663 biodegradation of polyethylene by the actinomycete Rhodococcus ruber. *International*  
664 *Biodegradation & Biodegradation* **84**, 204-210, doi:10.1016/j.ibiod.2012.03.001 (2013).
- 665 35 Martinez, D. *et al.* Genome sequence of the lignocellulose degrading fungus Phanerochaete  
666 chrysosporium strain RP78. *Nat Biotechnol* **22**, 695-700, doi:10.1038/nbt967 (2004).
- 667 36 Jeon, H. J. & Kim, M. N. Comparison of the functional characterization between alkane  
668 monooxygenases for low-molecular-weight polyethylene biodegradation. *International*  
669 *Biodegradation & Biodegradation* **114**, 202-208, doi:10.1016/j.ibiod.2016.06.012 (2016).
- 670 37 Yuka Iiyoshi , Y. T., Tomoaki Nishida. Polyethylene degradation by lignin-degrading fungi  
671 and manganese peroxidase. *Journal of Wood Science* **4**, 222-229 (1998).
- 672 38 Ehara, K., Iiyoshi, Y., Tsutsumi, Y. & Nishida, T. Polyethylene degradation by manganese  
673 peroxidase in the absence of hydrogen peroxide. *Journal of Wood Science* **46**, 180-183,  
674 doi:Doi 10.1007/Bf00777369 (2000).

- 675 39 Zhao, J. C., Guo, Z., Ma, X. Y., Liang, G. Z. & Wang, J. L. Novel surface modification of  
676 high-density polyethylene films by using enzymatic catalysis. *Journal of Applied Polymer  
677 Science* **91**, 3673-3678, doi:10.1002/app.13619 (2004).
- 678 40 Han, X. *et al.* Structural insight into catalytic mechanism of PET hydrolase. *Nat Commun* **8**,  
679 2106, doi:10.1038/s41467-017-02255-z (2017).
- 680 41 Moog, D. *et al.* Using a marine microalga as a chassis for polyethylene terephthalate (PET)  
681 degradation. *Microb Cell Fact* **18**, 171, doi:10.1186/s12934-019-1220-z (2019).
- 682 42 Austin, H. P. *et al.* Characterization and engineering of a plastic-degrading aromatic  
683 polyesterase. *Proc Natl Acad Sci U S A* **115**, E4350-E4357, doi:10.1073/pnas.1718804115  
684 (2018).
- 685 43 Ronkvist, Å. M., Xie, W., Lu, W. & Gross, R. A. Cutinase-Catalyzed Hydrolysis of  
686 Poly(ethylene terephthalate). *Macromolecules* **42**, 5128-5138, doi:10.1021/ma9005318 (2009).
- 687 44 Wierckx N, N. T., Eberlein C, et al. . Plastic biodegradation: Challenges and opportunities.  
688 *Consequences of Microbial Interactions with Hydrocarbons, Oils, and Lipids: Biodegradation  
689 and Bioremediation*, 1-29 (2018).
- 690 45 Billig, S., Oeser, T., Birkemeyer, C. & Zimmermann, W. Hydrolysis of cyclic poly(ethylene  
691 terephthalate) trimers by a carboxylesterase from *Thermobifida fusca* KW3. *Appl Microbiol  
692 Biotechnol* **87**, 1753-1764, doi:10.1007/s00253-010-2635-y (2010).
- 693 46 Talavera, A. *et al.* Phosphorylation decelerates conformational dynamics in bacterial  
694 translation elongation factors. *Science advances* **4**, eaap9714 (2018).
- 695 47 Jolly, C. & Morimoto, R. I. Role of the heat shock response and molecular chaperones in  
696 oncogenesis and cell death. *J. Natl. Cancer Inst.* **92**, 1564-1572 (2000).
- 697 48 Deangelis, K. M. *et al.* Evidence supporting dissimilatory and assimilatory lignin degradation  
698 in *Enterobacter lignolyticus* SCF1. *Front Microbiol* **4**, 280, doi:10.3389/fmicb.2013.00280  
699 (2013).
- 700 49 Mifflin, B. J. & Habash, D. Z. The role of glutamine synthetase and glutamate dehydrogenase  
701 in nitrogen assimilation and possibilities for improvement in the nitrogen utilization of crops.  
702 *J. Exp. Bot.* **53**, 979-987 (2002).
- 703 50 Wang, C. *et al.* Photo-aging of polyvinyl chloride microplastic in the presence of natural  
704 organic acids. *Water Res* **183**, 116082, doi:10.1016/j.watres.2020.116082 (2020).
- 705 51 Bugg, T. D., Ahmad, M., Hardiman, E. M. & Rahmanpour, R. Pathways for degradation of  
706 lignin in bacteria and fungi. *Nat Prod Rep* **28**, 1883-1896, doi:10.1039/c1np00042j (2011).

- 707 52 Koutny, M., Lemaire, J. & Delort, A. M. Biodegradation of polyethylene films with  
708 prooxidant additives. *Chemosphere* **64**, 1243-1252, doi:10.1016/j.chemosphere.2005.12.060  
709 (2006).
- 710 53 Patro, L. P. P. & Rathinavelan, T. Targeting the Sugary Armor of Klebsiella Species. *Front*  
711 *Cell Infect Microbiol* **9**, 367, doi:10.3389/fcimb.2019.00367 (2019).
- 712 54 Wilkes, R. A. & Aristilde, L. Degradation and metabolism of synthetic plastics and associated  
713 products by *Pseudomonas* sp.: capabilities and challenges. *J Appl Microbiol* **123**, 582-593,  
714 doi:10.1111/jam.13472 (2017).
- 715 55 Danko, A. S., Luo, M., Bagwell, C. E., Brigmon, R. L. & Freedman, D. L. Involvement of  
716 linear plasmids in aerobic biodegradation of vinyl chloride. *Appl Environ Microbiol* **70**, 6092-  
717 6097, doi:10.1128/AEM.70.10.6092-6097.2004 (2004).
- 718 56 Vaillancourt, F. H., Labbe, G., Drouin, N. M., Fortin, P. D. & Eltis, L. D. The mechanism-  
719 based inactivation of 2,3-dihydroxybiphenyl 1,2-dioxygenase by catecholic substrates. *J Biol*  
720 *Chem* **277**, 2019-2027, doi:10.1074/jbc.M106890200 (2002).
- 721 57 Khandare, S. D., Chaudhary, D. R. & Jha, B. Bioremediation of polyvinyl chloride (PVC)  
722 films by marine bacteria. *Mar Pollut Bull* **169**, 112566, doi:10.1016/j.marpolbul.2021.112566  
723 (2021).
- 724 58 Rodriguez-Medina, N., Barrios-Camacho, H., Duran-Bedolla, J. & Garza-Ramos, U.  
725 *Klebsiella variicola*: an emerging pathogen in humans. *Emerg Microbes Infect* **8**, 973-988,  
726 doi:10.1080/22221751.2019.1634981 (2019).
- 727 59 Rosenblueth, M., Martinez, L., Silva, J. & Martinez-Romero, E. *Klebsiella variicola*, a novel  
728 species with clinical and plant-associated isolates. *Syst Appl Microbiol* **27**, 27-35,  
729 doi:10.1078/0723-2020-00261 (2004).
- 730 60 Feng, Y., Feng, J. & Shu, Q. L. Isolation and characterization of heterotrophic nitrifying and  
731 aerobic denitrifying *Klebsiella pneumoniae* and *Klebsiella variicola* strains from various  
732 environments. *J Appl Microbiol* **124**, 1195-1211, doi:10.1111/jam.13703 (2018).
- 733 61 Zhang, J. *et al.* Zn<sup>2+</sup>-dependent enhancement of Atrazine biodegradation by *Klebsiella*  
734 *variicola* FH-1. *Journal of Hazardous Materials* **411**, doi:10.1016/j.jhazmat.2021.125112  
735 (2021).
- 736 62 Dos Santos Melo-Nascimento, A. O. *et al.* Complete genome reveals genetic repertoire and  
737 potential metabolic strategies involved in lignin degradation by environmental ligninolytic  
738 *Klebsiella variicola* PICD1. *PLoS One* **15**, e0243739, doi:10.1371/journal.pone.0243739  
739 (2020).

- 740 63 Gopinath.S.M, I. S., Ashalatha, Shreya Ranjit. Isolation, Screening and Purification of  
741 Cellulase from Cellulase Producing *Klebsiella variicola* RBEB3 (KF036184.1). *International*  
742 *Journal of Science and Research* **3**, 1398-1403 (2014).
- 743 64 Meyer-Cifuentes, I. E. *et al.* Synergistic biodegradation of aromatic-aliphatic copolyester  
744 plastic by a marine microbial consortium. *Nat Commun* **11**, 5790, doi:10.1038/s41467-020-  
745 19583-2 (2020).
- 746 65 Krueger, M. C., Harms, H. & Schlosser, D. Prospects for microbiological solutions to  
747 environmental pollution with plastics. *Appl Microbiol Biotechnol* **99**, 8857-8874,  
748 doi:10.1007/s00253-015-6879-4 (2015).
- 749 66 Singh, B. & Sharma, N. Mechanistic implications of plastic degradation. *Polymer*  
750 *Degradation and Stability* **93**, 561-584, doi:10.1016/j.polymdegradstab.2007.11.008 (2008).
- 751 67 Gravouil, K. *et al.* Transcriptomics and Lipidomics of the Environmental Strain *Rhodococcus*  
752 *ruber* Point out Consumption Pathways and Potential Metabolic Bottlenecks for Polyethylene  
753 Degradation. *Environ Sci Technol* **51**, 5172-5181, doi:10.1021/acs.est.7b00846 (2017).
- 754 68 Abraham, J., Ghosh, E., Mukherjee, P. & Gajendiran, A. Microbial degradation of low density  
755 polyethylene. *Environmental Progress & Sustainable Energy* **36**, 147-154,  
756 doi:10.1002/ep.12467 (2017).
- 757 69 Delcher, A. L., Bratke, K. A., Powers, E. C. & Salzberg, S. L. Identifying bacterial genes and  
758 endosymbiont DNA with Glimmer. *Bioinformatics* **23**, 673-679,  
759 doi:10.1093/bioinformatics/btm009 (2007).
- 760

761 **Figure and Table Legends**

762 **Figure 1 Laboratory cultivation and intestinal microbiota composition of *Spodoptera***  
 763 ***frugiperda* larva feeding on corn leaf and PVC film.** a, laboratory feeding of *S. frugiperda*  
 764 larva with corn leaf (Corn group) and PVC film (PVC group). b-c, cumulative survival and  
 765 body weight loss of larva in the Corn group, PVC group, Starvation group (no feeding) and  
 766 Antibiotic group (gentamicin pretreatment of intestinal microbiota before PVC feeding). d-e,  
 767 intestinal microbiota composition at the phylum (d) and genus (e) levels.

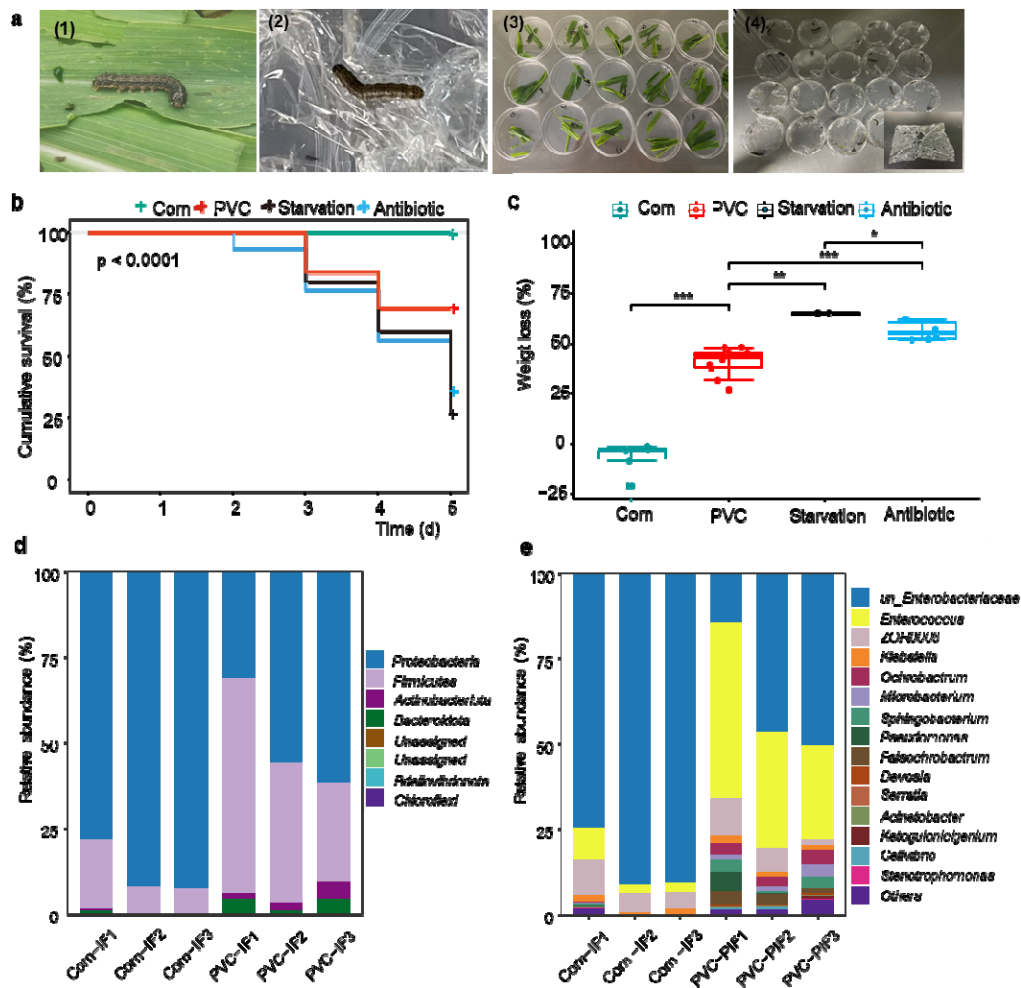

768

769

770 **Figure 2 Physicochemical characterization of PVC film degradation by strain EMBL-1.**

771 a-b, the SEM image (a) and the growth curve (b) of strain EMBL-1 after co-culturing with  
 772 PVC film for 10 days. c & e, the tensile strength (c) and the molecular weight (e) of PVC film  
 773 in the Control group and the EMBL-1 group after 90 days. d, f & g, the temporal change in  
 774 the weight loss (d) and the thermogravimetric analysis TGA (f) and FTIR (g) diagrams of  
 775 PVC film in the EMBL-1 group over 90 days. h, the total ion chromatogram (TIC) depicting  
 776 PVC degradation products.

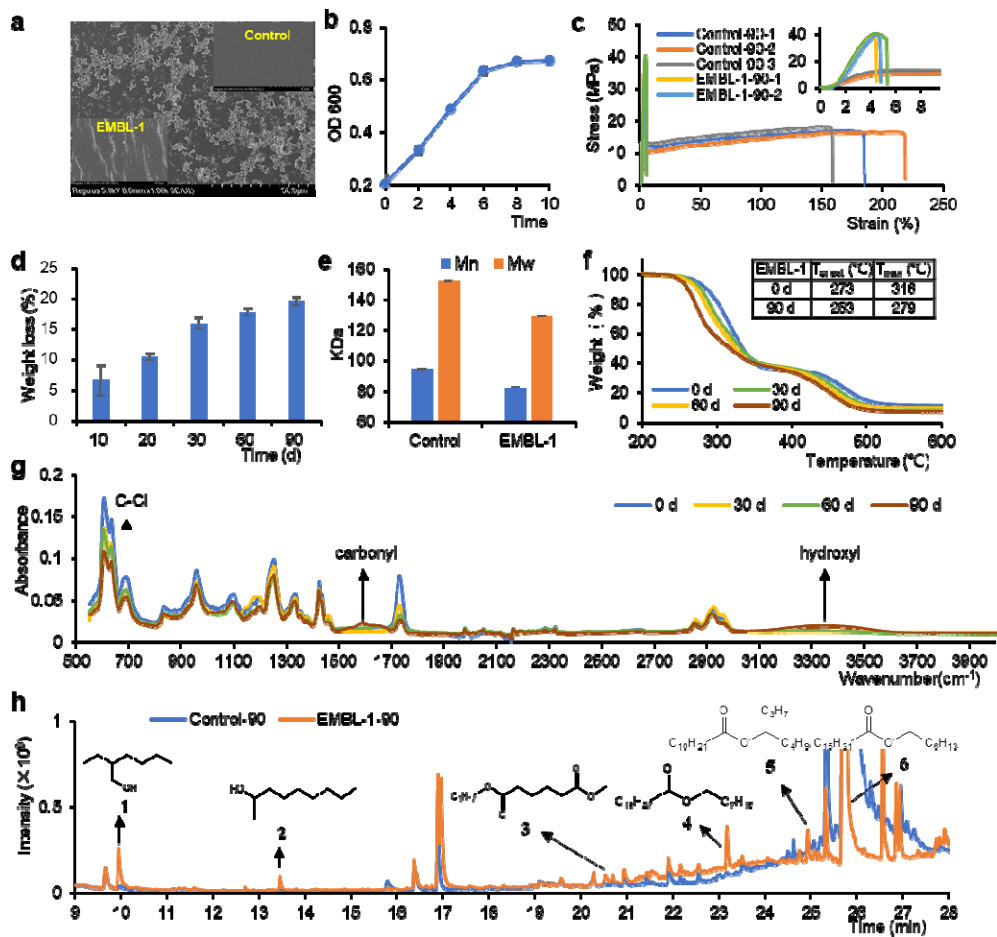

777

778

779 **Figure 3 Genome-level phylogeny and functional annotation of strain EMBL-1.** a, the  
 780 phylogenetic tree of EMBL-1 strain built with ITOL. b, the whole genome map of strain  
 781 EMBL-1. Rings from the outermost to the center: 1) scale marks of the genome, 2) protein-  
 782 coding genes on the forward strand, 3) protein-coding genes on the reverse strand, 4) tRNA  
 783 (black) and rRNA (red) genes on the forward strand, 5) tRNA (black) and rRNA (red) genes  
 784 on the reverse strand, 6) GC content, 7) GC skew. Protein-coding genes are color coded  
 785 according to their COG categories.

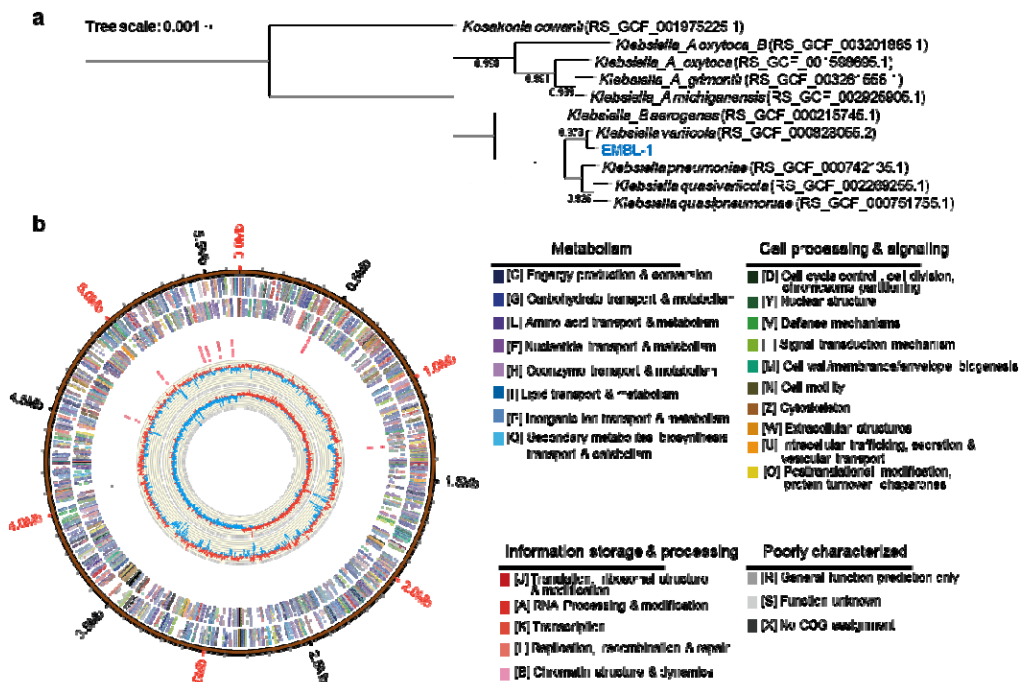

786

787



788 **Figure 4 Proteomic and transcriptomic analyses of PVC-degrading metabolic functions**  
 789 **of strain EMBL-1.** a-b, the weight loss of PVC film under the actions of strain EMBL-1  
 790 without and with glucose (glu) as supplementary carbon source (a), and four intracellular (IN)  
 791 or extracellular (OUT) protein extracts under *in vitro* conditions (b), respectively. c, venn  
 792 diagram showing shared and unique proteins in the protein extracts; d, 39 proteins involved in  
 793 intracellular and extracellular metabolism of PVC film. The five most abundant proteins in  
 794 the OUT extracts were marked in bold, while those were more upregulated in OUT extracts  
 795 than IN extracts ( $OUT/IN \geq 8$ ) were marked in blue. The proteins marked in red were detected  
 796 in both proteomes and transcriptomes. e, strain EMBL-1 cell culture concentration (as  $OD_{600}$ )  
 797 using PVC film as sole carbon source; f, volcano map showing protein-coding genes (read  
 798 spheres) significantly upregulated in the PVC group than control group. g, functional  
 799 annotation of up-regulated genes with those marked in red also detected in the proteome.

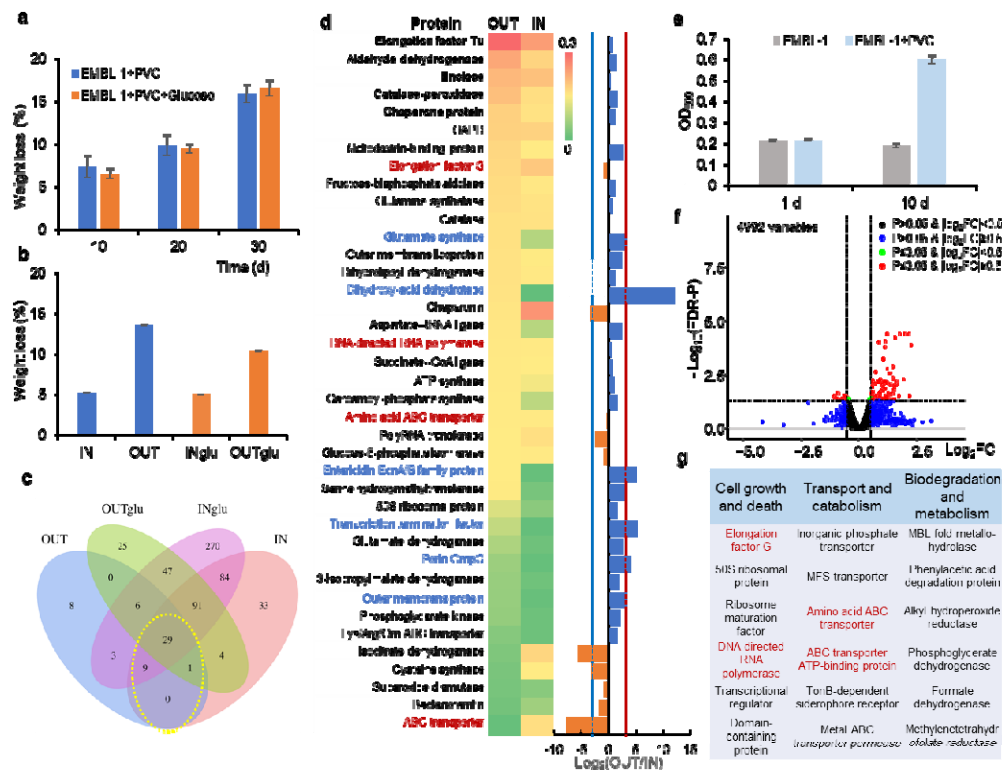

800



801 **Figure 5 Schematic diagram of the putative PVC degradation pathway by strain**  
 802 **EMBL-1.** The pathway was proposed based on the multi-omics analyses that integrate  
 803 genomic, proteomic, transcriptomic and metabolic results of the strain during growth on PVC  
 804 film.

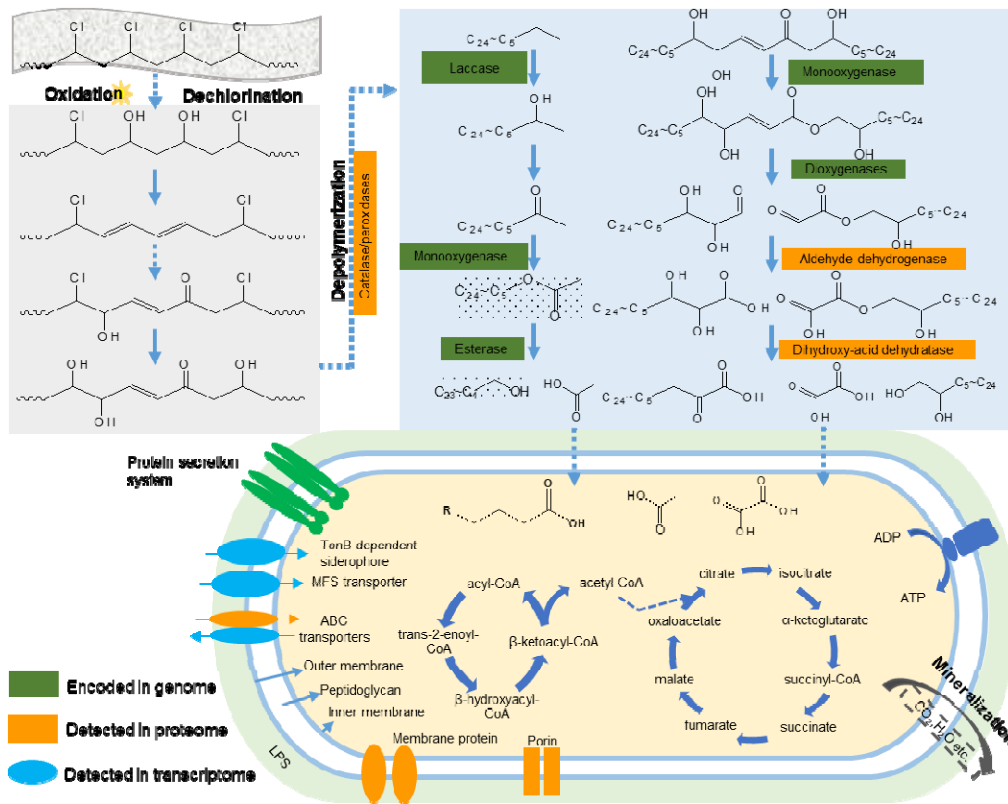

805

806 **Table 1 Literature review showing limited understanding on degrading microbial strains and degrading**  
 807 **enzymes of PVC relative to PE and PET.** Strain EMBL-1 is the first experimentally verified PVC-degrading  
 808 *Klebsiella* isolate by this study.

|     | Enzyme name                         | Source                                                                                                                    | Functional validation          | Protein-coding gene ID in the genome of strain EMBL-1 |
|-----|-------------------------------------|---------------------------------------------------------------------------------------------------------------------------|--------------------------------|-------------------------------------------------------|
|     | alkane hydroxylase <sup>1</sup>     | <i>Pseudomonas sp. E4</i>                                                                                                 | Recombinant strains (E coli)   | --                                                    |
|     | laccases <sup>2,3</sup>             | <i>Rhodococcus ruber</i>                                                                                                  | Crude culture supernatant      | orf01799, orf03107                                    |
|     | lignin peroxidases <sup>4</sup>     | <i>Phanerochaete chrysosporium</i>                                                                                        | Partially purified enzyme used | --                                                    |
| PE  | alkane monooxygenase <sup>5</sup>   | <i>Pseudomonas aeruginosa</i>                                                                                             | Recombinant strains (E coli)   | orf03472                                              |
|     | rubredoxin reductase <sup>5</sup>   | <i>Pseudomonas putida</i>                                                                                                 | Recombinant strains (E coli)   | --                                                    |
|     | Manganese peroxidase <sup>6,7</sup> | <i>Phanerochaete chrysosporium</i>                                                                                        | Partially purified enzyme used | orf03592                                              |
|     | soybean peroxidase <sup>8</sup>     | Commercial enzyme                                                                                                         | Purified enzyme used           |                                                       |
|     | PETase <sup>9-11</sup>              | <i>Ideonella sakaiensis</i>                                                                                               | Purified enzyme used           | --                                                    |
|     | lipases <sup>12</sup>               | <i>Ideonella sakaiensis</i>                                                                                               | Purified enzyme used           | orf03181                                              |
|     | esterase <sup>12,13</sup>           | <i>Ideonella sakaiensis</i>                                                                                               | Purified enzyme used           | orf00935,orf01938,orf03042,orf06956                   |
| PET | cutinases <sup>12,14</sup>          | <i>Ideonella sakaiensis</i> ,<br><i>Humilica insolens</i> ,<br><i>Pseudomonas mendocina</i> ,<br><i>Fusarium solani</i>   | Purified enzyme used           | --                                                    |
|     | carboxylesterases <sup>15,16</sup>  | <i>Thermobifida fusca</i> ,<br><i>Bacillus licheniformis</i> ,<br><i>Bacillus subtilis</i> ,<br><i>Thermobifida fusca</i> | Purified enzyme used           | orf00475, orf03403                                    |
| PVC | lignin peroxidase <sup>17</sup>     | <i>Phanerochaete chrysosporium</i>                                                                                        | Partially purified enzyme used | --                                                    |

809
